# Supplementary material for: Petrogenesis of early Paleozoic I-type granitoids in the Longshoushan and implications for the tectonic affinity and evolution of the southwestern Alxa Block
Source: Copernicus journal article supplement (doi:10.5194/se-16-179-2025), 2025-02-26
Supplement: Supplementary file 1 [file se-16-179-2025-supplement.zip]

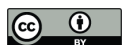

## *Supplement of*

# **Petrogenesis of early Paleozoic I-type granitoids in the Longshoushan and implications for the tectonic affinity and evolution of the southwestern Alxa Block**

**Renyu Zeng et al.**

*Correspondence to:* Renyu Zeng (zengrenyu@126.com)

- se-16-179-2025-supplement-title-page.pdf
- Figure S1.pdf
- Table S1.xls
- Table S2.xlsx
- Table S3.xlsx
- Table S4.xlsx
- Table S5.xls
- Table S6.xls

The copyright of individual parts of the supplement might differ from the article licence.
