# Supplementary material for: Petrogenesis of early Paleozoic I-type granitoids in the Longshoushan and implications for the tectonic affinity and evolution of the southwestern Alxa Block
Source: Copernicus journal article supplement (doi:10.5194/se-16-179-2025), 2025-02-26
Supplement: Supplementary file 3 [file Table S2.xlsx]

## Sheet: GZ20287154- Reported
Table S2. Major element (wt. %) and trace element (ppm) compositions
	SiO2	TiO2	Al2O3	TFe2O3	MnO	MgO	CaO	Na2O	K2O	P2O5	LOI	V	Cr	Ga	Rb	Sr	Y	Zr	Nb	Sn	Cs	Ba	Hf	Ta	W	Th	U	La	Ce	Pr	Nd	Sm	Eu	Gd	Tb	Dy	Ho	Er	Tm	Yb	Lu	ΣREE	LaN/YbN	δEu	δCe
JC-20-10	71.59	0.2	14.47	1.98	0.04	0.43	1.48	3.82	4.4	0.06	1.22	19	30	17.7	137.5	325	11.8	173	13.8	2	2.07	1335	4.3	1	1	19.45	2.71	36	79	6.97	22.4	3.77	0.75	2.5	0.38	2.19	0.42	1.21	0.22	1.16	0.2	157.17	22.261	0.746869	1.22277
JC-20-11	71.73	0.2	14.4	1.98	0.04	0.42	1.52	3.75	4.43	0.05	1.02	17	10	17.9	139	309	12.4	172	14.4	2	2.5	1275	4.3	1.1	<1	19.35	2.08	45.8	78	8.17	26.9	4.15	0.82	2.72	0.38	2.23	0.44	1.16	0.19	1.18	0.2	172.34	27.8409	0.746155	0.988634
JC-20-12	72.05	0.18	14.44	1.95	0.04	0.41	1.24	3.83	4.52	0.05	0.89	19	30	17.7	142	312	12.9	175	14.5	2	2.57	1300	4.6	1	1	20.2	2.14	44.9	94.5	8.35	27	4.31	0.82	2.77	0.42	2.34	0.45	1.21	0.22	1.18	0.2	188.67	27.2939	0.725536	1.1966
JC-20-13	71.82	0.19	14.4	2	0.04	0.45	1.38	3.88	4.47	0.06	1.02	21	20	17.5	140.5	315	12.6	171	14	2	2.11	1290	4.4	1	<1	21.2	2.38	44	90.2	8.08	26.8	4.31	0.86	2.99	0.42	2.38	0.46	1.22	0.21	1.24	0.2	183.37	25.4526	0.732399	1.17289
JC-20-20	75.77	0.08	12.36	1.23	0.02	0.11	0.22	3.1	6.18	0.01	0.5	14	30	14.4	185.5	51.2	12.1	134	10.5	2	2.95	198.5	4.8	1	1	54.9	2.67	14.7	37.6	3.17	11.3	2.36	0.3	2.1	0.36	2.17	0.47	1.3	0.27	1.31	0.22	77.63	8.04909	0.411983	1.35047
JC-20-22	76.18	0.06	12.34	1.22	0.02	0.09	0.27	3.13	5.89	0.01	0.52	9	10	15.4	159.5	39.2	14.3	71	5.7	1	2.64	189.5	2.6	0.6	1	43.5	2.06	24.3	51.7	5.56	19	3.9	0.21	2.78	0.42	2.47	0.5	1.45	0.24	1.46	0.24	114.23	11.9386	0.194979	1.09052
JC-20-23	76.09	0.05	12.33	0.91	0.02	0.16	0.53	3.09	5.54	0.01	0.62	8	50	13.8	157	60.2	20.8	58	10.3	2	3.04	283	2.2	0.9	1	25.7	1.49	19.2	40.5	4.38	15.5	3.29	0.3	2.8	0.5	3.25	0.71	2.06	0.34	2.16	0.34	95.33	6.376	0.302182	1.08281
