# Supplementary material for: Petrogenesis of early Paleozoic I-type granitoids in the Longshoushan and implications for the tectonic affinity and evolution of the southwestern Alxa Block
Source: Copernicus journal article supplement (doi:10.5194/se-16-179-2025), 2025-02-26
Supplement: Supplementary file 4 [file Table S3.xlsx]

## Sheet: Sheet1
Table S3. Zircon La-ICP-MS U-Pb isotopic data and ages
	Pb	Th	U	Th/U	207Pb/206Pb	207Pb/206Pb	207Pb/235U	207Pb/235U	206Pb/238U	206Pb/238U	207Pb/206Pb	207Pb/206Pb	207Pb/235U	207Pb/235U	206Pb/238U	206Pb/238U
					Ratio	1sigma	Ratio	1sigma	Ratio	1sigma	Age (Ma)	1sigma	Age (Ma)	1sigma	Age (Ma)	1sigma
	ppm	ppm	ppm
Analysis
Monzogranite
JC-20-09-02	153.811	174.48	1762.9	0.0989733	0.0527412	0.00474148	0.544253	0.0505023	0.0700713	0.0010551	316.725	205.53	441.225	33.2078	436.585	6.36057
JC-20-09-03	46.4059	543.732	554.826	0.980004	0.0569505	0.0013575	0.56197	0.013379	0.0712298	0.000659425	500.04	53.7	452.808	8.70268	443.56	3.97549
JC-20-09-04	54.469	117.417	718.105	0.163509	0.056649	0.0013428	0.564038	0.0136236	0.071751	0.000548347	479.67	47.2175	454.152	8.84989	446.696	3.30703
JC-20-09-06	43.7582	311.785	563.876	0.552932	0.0566566	0.00293836	0.568332	0.0183103	0.0707753	0.000717127	479.67	110.945	456.935	11.8587	440.825	4.32389
JC-20-09-07	69.8612	338.08	914.142	0.369834	0.0567151	0.00146395	0.544909	0.0144124	0.0693791	0.00071446	479.67	83.3225	441.656	9.47726	432.414	4.31322
JC-20-09-08	205.477	766.996	1491.68	0.514184	0.0513734	0.00473656	0.524939	0.0480256	0.06942	0.000876922	257.47	212.935	428.445	31.9793	432.66	5.29121
JC-20-09-09	108.293	437.481	1417.31	0.30867	0.0565382	0.00117031	0.563392	0.0136381	0.0717899	0.00096602	472.265	46.2925	453.732	8.86295	446.93	5.81526
JC-20-09-10	128.373	1569.43	1236.19	1.26957	0.0542085	0.00324954	0.539443	0.0351961	0.068739	0.000886312	388.94	135.173	438.057	23.2165	428.554	5.35106
JC-20-09-11	51.8866	387.573	661.478	0.58592	0.0544853	0.00195546	0.537149	0.0144649	0.0704657	0.000651478	390.79	84.25	436.543	9.55959	438.961	3.9304
JC-20-09-12	51.095	552.737	615.283	0.898346	0.0572836	0.00202618	0.554786	0.012333	0.0698653	0.00051488	501.89	77.7675	448.127	8.06007	435.344	3.11128
JC-20-09-13	48.0635	498.388	537.275	0.927622	0.0557801	0.00214704	0.557803	0.0148677	0.0714238	0.000709421	442.64	80.5475	450.095	9.69566	444.728	4.27511
JC-20-09-14	70.7384	565.905	807.447	0.700858	0.0573291	0.00127258	0.566107	0.0125626	0.0712419	0.000651642	505.595	49.995	455.493	8.15086	443.633	3.9287
JC-20-09-15	84.2378	690.444	910.813	0.758053	0.0569448	0.00254593	0.562901	0.0160799	0.0717198	0.000538132	500.04	98.135	453.413	10.4513	446.508	3.24584
JC-20-09-16	233.967	1485.82	2829.23	0.525167	0.0561006	0.00196947	0.569235	0.0280773	0.0714264	0.00120673	457.45	77.77	457.52	18.1702	444.744	7.26444
JC-20-09-17	51.4007	456.516	581.158	0.785529	0.0548773	0.00119637	0.5416	0.0124471	0.0710907	0.000626733	405.605	43.515	439.479	8.2038	442.724	3.77959
JC-20-09-09	36.3932	261.208	431.729	0.605028	0.0557341	0.00163653	0.551618	0.0164609	0.0714295	0.000733067	442.64	64.8075	446.056	10.7763	444.762	4.41714
JC-20-09-20	48.2566	458.846	585.611	0.783533	0.0552925	0.00134707	0.542554	0.0134472	0.070677	0.000562511	433.38	53.7	440.107	8.85662	440.233	3.39514
JC-20-09-21	101.267	721.5	1235.37	0.584035	0.0562225	0.00131111	0.554832	0.0121698	0.0715272	0.000811224	461.155	56.475	448.157	7.95334	445.35	4.88633
JC-20-09-22	68.861	713.916	795.599	0.897332	0.0554671	0.00152581	0.548243	0.0158614	0.0709973	0.000688613	431.53	65.735	443.845	10.4067	442.161	4.15169
JC-20-09-23	36.8156	293.965	428.809	0.685539	0.056117	0.0015972	0.56014	0.0155816	0.0721008	0.000685782	457.45	64.81	451.618	10.1456	448.8	4.13064
JC-20-09-24	68.548	875.007	715.593	1.22277	0.0553543	0.00135344	0.548206	0.013568	0.0714504	0.000687804	427.825	53.6975	443.821	8.90364	444.888	4.14516
JC-20-09-25	31.1915	292.085	371.54	0.786146	0.0553575	0.00164158	0.535364	0.0151984	0.0700071	0.000580503	427.825	66.66	435.364	10.0555	436.198	3.50525
JC-20-09-26	63.5214	873.789	699.785	1.24865	0.0571333	0.00128437	0.552526	0.0126198	0.0696888	0.000597653	498.19	45.365	446.65	8.25918	434.281	3.60935
JC-20-09-27	38.6319	296.099	448.625	0.660015	0.0555435	0.00155435	0.542701	0.0144494	0.0705982	0.000636183	435.23	61.105	440.204	9.51507	439.758	3.83802
JC-20-09-28	98.0176	907.55	1157.21	0.784257	0.0558419	0.00300213	0.544125	0.0156739	0.0698478	0.000724351	455.6	120.358	441.141	10.3112	435.239	4.37093
K-feldspar granite
JC-20-19-01	63.7461	461.254	747.944	0.616695	0.056155	0.0015499	0.542138	0.0148105	0.0697599	0.000587541	457.45	62.9575	439.833	9.75617	434.709	3.54832
JC-20-19-02	487.004	78.3122	1477.62	0.0529987	0.113547	0.00187554	4.77136	0.0817819	0.303513	0.00297825	1857.41	29.6325	1779.87	14.4391	1708.7	14.7576
JC-20-19-03	42.1475	371.517	481.042	0.772317	0.0537994	0.0013071	0.521594	0.0124202	0.0700267	0.000596614	361.165	55.55	426.216	8.29323	436.317	3.60204
JC-20-19-05	104.844	83.7799	229.078	0.365726	0.139114	0.00275175	7.44517	0.148986	0.385229	0.00332515	2216.36	33.4875	2166.42	17.9734	2100.67	15.5157
JC-20-19-07	236.951	188.288	389.605	0.483279	0.149834	0.00305677	8.37726	0.164592	0.403142	0.00339125	2344.14	39.97	2272.72	17.8892	2183.49	15.6248
JC-20-19-08	35.984	245.072	434.856	0.56357	0.0578698	0.00210074	0.573317	0.0178178	0.0713989	0.000851899	524.11	84.245	460.158	11.5034	444.578	5.13134
JC-20-19-10	38.8306	263.032	467.149	0.563058	0.056247	0.00192722	0.552808	0.0154484	0.0709612	0.000719199	461.155	108.32	446.834	10.1063	441.944	4.33563
JC-20-19-11	43.8024	468.501	474.624	0.987098	0.0552333	0.00137758	0.542202	0.0134396	0.0707395	0.000613779	420.42	55.55	439.876	8.85363	440.609	3.70292
JC-20-19-12	66.2159	394.828	795.934	0.496057	0.056945	0.00128348	0.562409	0.0129435	0.071398	0.000861505	500.04	49.995	453.093	8.41742	444.573	5.18908
JC-20-19-13	48.4042	295.382	578.415	0.510675	0.0557313	0.00143208	0.550141	0.0136764	0.0714378	0.000667968	442.64	57.4025	445.089	8.96353	444.812	4.02607
JC-20-19-14	195.216	325.202	323.529	1.00517	0.146633	0.00296746	8.83188	0.186585	0.435688	0.00509608	2307.1	35.3425	2320.79	19.334	2331.31	22.9166
JC-20-19-15	109.241	785.285	1293.29	0.607202	0.0533471	0.00229348	0.531475	0.0171966	0.0716229	0.0010339	342.65	98.1375	432.788	11.4053	445.926	6.22413
JC-20-19-16	47.3552	174.513	610.891	0.285669	0.0548484	0.00132541	0.531954	0.0124865	0.0701635	0.000592059	405.605	53.6975	433.106	8.28132	437.14	3.57423
JC-20-19-17	23.2362	210.047	255.569	0.82188	0.0540482	0.00216697	0.527107	0.0158209	0.0703536	0.000625011	372.275	90.7325	429.888	10.5235	438.285	3.77168
JC-20-19-18	54.4847	327.952	652.797	0.50238	0.0558303	0.00116211	0.553992	0.012239	0.0715228	0.000747699	455.6	50.92	447.608	8.00279	445.324	4.50467
JC-20-19-20	340.541	103.214	1153.12	0.0895081	0.112945	0.00193476	5.11177	0.0892855	0.32649	0.00333537	1847.22	31.4825	1838.06	14.8861	1821.35	16.2389
JC-20-19-21	192.502	729.094	2350.29	0.310214	0.0570662	0.00139621	0.55845	0.0138531	0.0705942	0.000837893	494.485	53.6975	450.517	9.03094	439.735	5.05083
JC-20-19-22	438.18	44.3152	1448.88	0.0305858	0.115843	0.0019753	5.56393	0.0985721	0.345781	0.00324238	1894.44	31.0175	1910.53	15.3035	1914.42	15.5656
JC-20-19-23	53.6776	379.35	630.021	0.602123	0.0556228	0.00206545	0.533301	0.018346	0.0693534	0.000800758	438.935	81.4725	433.998	12.1527	432.259	4.83287
JC-20-19-24	86.8507	704.466	916.061	0.769016	0.0572681	0.00158046	0.559243	0.0147914	0.0710005	0.000913196	501.89	61.105	451.033	9.6371	442.181	5.50176
JC-20-19-25	36.2723	222.338	442.289	0.502698	0.0550716	0.00139087	0.531523	0.0135354	0.0696601	0.000724568	416.715	55.55	432.82	8.97866	434.107	4.37297
JC-20-19-27	31.9492	253.193	365.528	0.692677	0.0554726	0.00161717	0.541276	0.0152194	0.0704735	0.000669806	431.53	64.8075	439.266	10.0309	439.008	4.04055
JC-20-19-28	176.554	1347.76	2067.68	0.651824	0.0546087	0.00144103	0.534148	0.0149049	0.0702988	0.000710518	394.495	54.625	434.558	9.86933	437.956	4.28598

## Sheet: Sheet2
	Pb	Th	U	Th/U	207Pb/206Pb	207Pb/206Pb	207Pb/235U	207Pb/235U	206Pb/238U	206Pb/238U	207Pb/206Pb	207Pb/206Pb	207Pb/235U	207Pb/235U	206Pb/238U	206Pb/238U
					Ratio	1sigma	Ratio	1sigma	Ratio	1sigma	Age (Ma)	1sigma	Age (Ma)	1sigma	Age (Ma)	1sigma
	ppm	ppm	ppm
Analysis
JC-20-09-02	153.811	174.48	1762.9	0.0989733	0.0527412	0.00474148	0.544253	0.0505023	0.0700713	0.0010551	316.725	205.53	441.225	33.2078	436.585	6.36057
JC-20-09-03	46.4059	543.732	554.826	0.980004	0.0569505	0.0013575	0.56197	0.013379	0.0712298	0.000659425	500.04	53.7	452.808	8.70268	443.56	3.97549
JC-20-09-04	54.469	117.417	718.105	0.163509	0.056649	0.0013428	0.564038	0.0136236	0.071751	0.000548347	479.67	47.2175	454.152	8.84989	446.696	3.30703
JC-20-09-06	43.7582	311.785	563.876	0.552932	0.0566566	0.00293836	0.568332	0.0183103	0.0707753	0.000717127	479.67	110.945	456.935	11.8587	440.825	4.32389
JC-20-09-07	69.8612	338.08	914.142	0.369834	0.0567151	0.00146395	0.544909	0.0144124	0.0693791	0.00071446	479.67	83.3225	441.656	9.47726	432.414	4.31322
JC-20-09-08	205.477	766.996	1491.68	0.514184	0.0513734	0.00473656	0.524939	0.0480256	0.06942	0.000876922	257.47	212.935	428.445	31.9793	432.66	5.29121
JC-20-09-09	108.293	437.481	1417.31	0.30867	0.0565382	0.00117031	0.563392	0.0136381	0.0717899	0.00096602	472.265	46.2925	453.732	8.86295	446.93	5.81526
JC-20-09-10	128.373	1569.43	1236.19	1.26957	0.0542085	0.00324954	0.539443	0.0351961	0.068739	0.000886312	388.94	135.173	438.057	23.2165	428.554	5.35106
JC-20-09-11	51.8866	387.573	661.478	0.58592	0.0544853	0.00195546	0.537149	0.0144649	0.0704657	0.000651478	390.79	84.25	436.543	9.55959	438.961	3.9304
JC-20-09-12	51.095	552.737	615.283	0.898346	0.0572836	0.00202618	0.554786	0.012333	0.0698653	0.00051488	501.89	77.7675	448.127	8.06007	435.344	3.11128
JC-20-09-13	48.0635	498.388	537.275	0.927622	0.0557801	0.00214704	0.557803	0.0148677	0.0714238	0.000709421	442.64	80.5475	450.095	9.69566	444.728	4.27511
JC-20-09-14	70.7384	565.905	807.447	0.700858	0.0573291	0.00127258	0.566107	0.0125626	0.0712419	0.000651642	505.595	49.995	455.493	8.15086	443.633	3.9287
JC-20-09-15	84.2378	690.444	910.813	0.758053	0.0569448	0.00254593	0.562901	0.0160799	0.0717198	0.000538132	500.04	98.135	453.413	10.4513	446.508	3.24584
JC-20-09-16	233.967	1485.82	2829.23	0.525167	0.0561006	0.00196947	0.569235	0.0280773	0.0714264	0.00120673	457.45	77.77	457.52	18.1702	444.744	7.26444
JC-20-09-17	51.4007	456.516	581.158	0.785529	0.0548773	0.00119637	0.5416	0.0124471	0.0710907	0.000626733	405.605	43.515	439.479	8.2038	442.724	3.77959
JC-20-09-09	36.3932	261.208	431.729	0.605028	0.0557341	0.00163653	0.551618	0.0164609	0.0714295	0.000733067	442.64	64.8075	446.056	10.7763	444.762	4.41714
JC-20-09-20	48.2566	458.846	585.611	0.783533	0.0552925	0.00134707	0.542554	0.0134472	0.070677	0.000562511	433.38	53.7	440.107	8.85662	440.233	3.39514
JC-20-09-21	101.267	721.5	1235.37	0.584035	0.0562225	0.00131111	0.554832	0.0121698	0.0715272	0.000811224	461.155	56.475	448.157	7.95334	445.35	4.88633
JC-20-09-22	68.861	713.916	795.599	0.897332	0.0554671	0.00152581	0.548243	0.0158614	0.0709973	0.000688613	431.53	65.735	443.845	10.4067	442.161	4.15169
JC-20-09-23	36.8156	293.965	428.809	0.685539	0.056117	0.0015972	0.56014	0.0155816	0.0721008	0.000685782	457.45	64.81	451.618	10.1456	448.8	4.13064
JC-20-09-24	68.548	875.007	715.593	1.22277	0.0553543	0.00135344	0.548206	0.013568	0.0714504	0.000687804	427.825	53.6975	443.821	8.90364	444.888	4.14516
JC-20-09-25	31.1915	292.085	371.54	0.786146	0.0553575	0.00164158	0.535364	0.0151984	0.0700071	0.000580503	427.825	66.66	435.364	10.0555	436.198	3.50525
JC-20-09-26	63.5214	873.789	699.785	1.24865	0.0571333	0.00128437	0.552526	0.0126198	0.0696888	0.000597653	498.19	45.365	446.65	8.25918	434.281	3.60935
JC-20-09-27	38.6319	296.099	448.625	0.660015	0.0555435	0.00155435	0.542701	0.0144494	0.0705982	0.000636183	435.23	61.105	440.204	9.51507	439.758	3.83802
JC-20-09-28	98.0176	907.55	1157.21	0.784257	0.0558419	0.00300213	0.544125	0.0156739	0.0698478	0.000724351	455.6	120.358	441.141	10.3112	435.239	4.37093
JC-20-19-01	63.7461	461.254	747.944	0.616695	0.056155	0.0015499	0.542138	0.0148105	0.0697599	0.000587541	457.45	62.9575	439.833	9.75617	434.709	3.54832
JC-20-19-02	487.004	78.3122	1477.62	0.0529987	0.113547	0.00187554	4.77136	0.0817819	0.303513	0.00297825	1857.41	29.6325	1779.87	14.4391	1708.7	14.7576
JC-20-19-03	42.1475	371.517	481.042	0.772317	0.0537994	0.0013071	0.521594	0.0124202	0.0700267	0.000596614	361.165	55.55	426.216	8.29323	436.317	3.60204
JC-20-19-05	104.844	83.7799	229.078	0.365726	0.139114	0.00275175	7.44517	0.148986	0.385229	0.00332515	2216.36	33.4875	2166.42	17.9734	2100.67	15.5157
JC-20-19-07	236.951	188.288	389.605	0.483279	0.149834	0.00305677	8.37726	0.164592	0.403142	0.00339125	2344.14	39.97	2272.72	17.8892	2183.49	15.6248
JC-20-19-08	35.984	245.072	434.856	0.56357	0.0578698	0.00210074	0.573317	0.0178178	0.0713989	0.000851899	524.11	84.245	460.158	11.5034	444.578	5.13134
JC-20-19-10	38.8306	263.032	467.149	0.563058	0.056247	0.00192722	0.552808	0.0154484	0.0709612	0.000719199	461.155	108.32	446.834	10.1063	441.944	4.33563
JC-20-19-11	43.8024	468.501	474.624	0.987098	0.0552333	0.00137758	0.542202	0.0134396	0.0707395	0.000613779	420.42	55.55	439.876	8.85363	440.609	3.70292
JC-20-19-12	66.2159	394.828	795.934	0.496057	0.056945	0.00128348	0.562409	0.0129435	0.071398	0.000861505	500.04	49.995	453.093	8.41742	444.573	5.18908
JC-20-19-13	48.4042	295.382	578.415	0.510675	0.0557313	0.00143208	0.550141	0.0136764	0.0714378	0.000667968	442.64	57.4025	445.089	8.96353	444.812	4.02607
JC-20-19-14	195.216	325.202	323.529	1.00517	0.146633	0.00296746	8.83188	0.186585	0.435688	0.00509608	2307.1	35.3425	2320.79	19.334	2331.31	22.9166
JC-20-19-15	109.241	785.285	1293.29	0.607202	0.0533471	0.00229348	0.531475	0.0171966	0.0716229	0.0010339	342.65	98.1375	432.788	11.4053	445.926	6.22413
JC-20-19-16	47.3552	174.513	610.891	0.285669	0.0548484	0.00132541	0.531954	0.0124865	0.0701635	0.000592059	405.605	53.6975	433.106	8.28132	437.14	3.57423
JC-20-19-17	23.2362	210.047	255.569	0.82188	0.0540482	0.00216697	0.527107	0.0158209	0.0703536	0.000625011	372.275	90.7325	429.888	10.5235	438.285	3.77168
JC-20-19-18	54.4847	327.952	652.797	0.50238	0.0558303	0.00116211	0.553992	0.012239	0.0715228	0.000747699	455.6	50.92	447.608	8.00279	445.324	4.50467
JC-20-19-20	340.541	103.214	1153.12	0.0895081	0.112945	0.00193476	5.11177	0.0892855	0.32649	0.00333537	1847.22	31.4825	1838.06	14.8861	1821.35	16.2389
JC-20-19-21	192.502	729.094	2350.29	0.310214	0.0570662	0.00139621	0.55845	0.0138531	0.0705942	0.000837893	494.485	53.6975	450.517	9.03094	439.735	5.05083
JC-20-19-22	438.18	44.3152	1448.88	0.0305858	0.115843	0.0019753	5.56393	0.0985721	0.345781	0.00324238	1894.44	31.0175	1910.53	15.3035	1914.42	15.5656
JC-20-19-23	53.6776	379.35	630.021	0.602123	0.0556228	0.00206545	0.533301	0.018346	0.0693534	0.000800758	438.935	81.4725	433.998	12.1527	432.259	4.83287
JC-20-19-24	86.8507	704.466	916.061	0.769016	0.0572681	0.00158046	0.559243	0.0147914	0.0710005	0.000913196	501.89	61.105	451.033	9.6371	442.181	5.50176
JC-20-19-25	36.2723	222.338	442.289	0.502698	0.0550716	0.00139087	0.531523	0.0135354	0.0696601	0.000724568	416.715	55.55	432.82	8.97866	434.107	4.37297
JC-20-19-27	31.9492	253.193	365.528	0.692677	0.0554726	0.00161717	0.541276	0.0152194	0.0704735	0.000669806	431.53	64.8075	439.266	10.0309	439.008	4.04055
JC-20-19-28	176.554	1347.76	2067.68	0.651824	0.0546087	0.00144103	0.534148	0.0149049	0.0702988	0.000710518	394.495	54.625	434.558	9.86933	437.956	4.28598
