# Supplementary material for: Petrogenesis of early Paleozoic I-type granitoids in the Longshoushan and implications for the tectonic affinity and evolution of the southwestern Alxa Block
Source: Copernicus journal article supplement (doi:10.5194/se-16-179-2025), 2025-02-26
Supplement: Supplementary file 5 [file Table S4.xlsx]

## Sheet: Sheet1
Table S4 The zircon major element (wt. %) and trace element (ppm)
Analysis	SiO2	P	Ti	Y	Nb	La	Ce	Pr	Nd	Sm	Eu	Gd	Tb	Dy	Ho	Er	Tm	Yb	Lu	Hf	Ta	ΣREE	LREE	HREE	LREE/HREE	δEu	δCe
Monzogranite
JC-20-09-03	32.7313	506.023	13.8213	834.152	4.60443	4.49227	56.4998	3.82788	18.571	11.1313	1.70686	23.7251	7.45687	79.4944	27.8372	125.714	28.867	276.508	52.9032	9642.78	1.64641	718.734	96.2291	622.505	0.154584	0.321102	3.34056
JC-20-09-07	32.7313	383.771	4.90465	1077.52	3.67302	0.0236842	14.7205	0.0351747	0.80246	2.23888	0.455052	18.4789	6.97362	90.0155	36.3129	167.964	39.5123	390.402	72.9724	11013.9	2.81252	840.907	18.2758	822.631	0.0222163	0.216288	125.044
JC-20-09-11	32.7313	374.457	8.80028	866.893	11.3065	1.69863	63.0869	1.90894	11.6674	7.07953	0.731712	20.3211	6.37757	73.1134	28.8492	132.7	31.3526	307.127	59.3356	10656.2	2.94332	745.349	86.1731	659.176	0.130728	0.186504	8.58969
JC-20-09-13	32.7313	465.369	15.3171	2404.16	4.2973	1.09592	26.36	1.19866	11.6598	15.5081	2.71895	73.3689	22.0695	236.281	83.4151	341.477	68.2709	608.329	105.625	7866.29	1.26249	1597.38	58.5415	1538.84	0.0380427	0.246427	5.6389
JC-20-09-15	32.7313	786.889	6.21376	1871.59	7.38502	7.49274	148.64	5.16752	30.242	18.6274	1.35199	59.2619	17.3776	185.665	65.1407	271.323	56.3427	496.435	89.6323	8852.42	2.0822	1452.7	211.522	1241.18	0.17042	0.124403	5.85678
JC-20-09-16	32.7313	768.212	8.15479	2830.16	18.2365	9.69516	74.9474	5.55354	31.4869	18.2694	2.0598	64.2944	20.9179	245.362	91.269	407.087	88.018	814.433	148.94	8460.81	5.38369	2022.33	142.012	1880.32	0.0755254	0.183739	2.50426
JC-20-09-17	32.7313	410.032	6.72512	1524.1	3.48309	0.528637	33.0443	0.468715	5.83888	8.06264	2.22347	38.9014	12.1983	135.46	50.8135	225.932	49.8027	471.46	91.5624	9380.97	1.36857	1126.3	50.1667	1076.13	0.0466177	0.383825	16.276
JC-20-09-09	32.7313	451.117	5.2047	875.629	3.88481	0.897775	52.6114	1.68564	11.379	7.43263	0.887827	21.6112	6.98923	78.5106	29.381	132.994	28.9898	276.194	54.6063	9372.78	1.2425	704.17	74.8942	629.276	0.119016	0.214161	10.4857
JC-20-09-21	32.7313	477.43	18.1077	1881.66	10.1196	7.1935	35.5427	7.81331	40.7369	25.901	3.15257	63.1084	18.8984	196.855	67.0786	276.997	56.3659	498.015	87.2395	10107.2	2.9653	1384.9	120.34	1264.56	0.0951637	0.23839	1.16238
JC-20-09-22	32.7313	472.889	11.0558	1329.92	5.14288	4.05874	66.0719	3.20612	17.6289	10.8283	1.23528	33.9584	11.2811	122.467	46.1157	203.071	44.6595	418.612	80.4938	10068.9	1.66058	1063.69	103.029	960.659	0.107249	0.196941	4.49072
JC-20-09-23	32.7313	372.636	6.22545	1810.31	1.9067	0.104678	16.9665	0.550523	7.5868	12.6369	2.29081	55.2378	17.0266	181.691	65.6386	268.901	54.65	497.856	90.2267	8239.76	0.772184	1271.36	40.1361	1231.23	0.0325985	0.265079	17.3285
JC-20-09-24	32.7313	565.219	5.61435	4005.06	4.87022	0.186189	60.932	1.1171	17.2622	25.7749	5.51074	116.599	35.4233	383.733	135.014	566.656	113.557	1013.39	185.309	7689.28	1.39366	2660.47	110.783	2549.69	0.0434497	0.307318	32.7573
JC-20-09-25	32.7313	341.257	5.0164	1233.89	2.91494	0.356337	27.6106	0.670179	6.58209	8.50569	1.46999	32.4247	10.6943	118.885	43.2675	190.009	40.2768	377.752	69.6873	8746.82	0.826317	928.192	45.1949	882.997	0.0511836	0.27061	13.8527
JC-20-09-26	32.7313	571.633	14.778	1649.44	6.22034	4.1077	46.1852	3.10495	18.6219	15.0433	2.04781	49.4905	15.5136	165.16	59.5246	249.834	51.9933	476.231	85.2947	7674.22	1.46521	1242.15	89.1109	1153.04	0.0772833	0.229446	3.17074
JC-20-09-27	32.7313	366.962	4.86831	1697.69	1.2807	0.0213081	14.5298	0.342598	5.93483	10.4773	1.86175	50.7761	16.0939	171.843	62.8126	257.6	53.8803	477.034	86.9105	8117.09	0.692719	1210.12	33.1676	1176.95	0.0281809	0.24677	41.6945
JC-20-09-28	32.7313	655.27	4.10262	1686.37	31.8648	10.4622	67.2663	7.72423	42.5921	22.0302	2.15779	49.8634	14.7526	160.284	57.6654	255.828	55.3791	511.91	96.0855	9597.63	3.39639	1354	152.233	1201.77	0.126674	0.199036	1.83461
K-feldspar granite
JC-20-19-01	32.7313	594.781	4.45528	832.004	4.17903	6.50109	50.8641	2.19923	10.6781	5.78692	0.774203	18.0676	6.1323	72.3925	28.0068	128.112	28.8577	285.093	50.853	8690.55	1.67926	694.319	76.8037	617.515	0.124375	0.231475	3.29813
JC-20-19-03	32.7313	588.469	10.9964	1735.47	8.37592	0.0550285	63.3945	0.263547	4.33215	8.00029	2.29721	35.1657	12.1416	144.882	56.4302	255.142	56.8332	539.215	99.5599	7889.58	1.71146	1277.71	78.3428	1199.37	0.0653199	0.418709	129.067
JC-20-19-10	32.7313	376.629	4.69698	1066.03	3.53539	2.25157	46.8942	1.76696	9.22788	8.01066	1.38963	26.444	8.59009	99.235	35.9633	158.669	35.0394	330.318	59.7635	9062.24	1.20273	823.564	69.5409	754.023	0.0922265	0.291894	5.76431
JC-20-19-11	32.7313	538.433	8.75713	1438.63	3.69739	0.36683	50.8872	0.809097	10.4071	11.9774	3.23684	46.2136	13.387	139.318	47.6142	199.27	41.4417	386.65	66.8943	8111.64	1.12744	1018.47	77.6845	940.789	0.0825737	0.42061	22.9013
JC-20-19-12	32.7313	359.063	2.58089	762.583	4.88261	2.25136	37.8779	2.37171	12.3957	7.2568	1.11835	18.6449	6.07383	68.7139	25.289	115.027	27.6785	272.85	48.0119	9230.52	1.77439	645.561	63.2719	582.289	0.108661	0.293932	4.019
JC-20-19-13	32.7313	422.041	3.01871	668.902	2.97191	2.8199	27.7076	0.912062	4.8926	3.44077	0.316143	12.563	4.75133	57.499	21.9949	103.645	23.7955	237.165	40.7485	8882.79	1.39862	542.252	40.0891	502.163	0.0798329	0.147005	4.23599
JC-20-19-16	32.7313	375.328	3.5316	744.878	3.63185	1.93187	42.6408	1.87928	10.9329	7.05112	1.1924	17.9458	5.60166	62.4504	23.7189	113.908	27.2139	273.758	52.3873	9746.08	2.26516	642.613	65.6283	576.985	0.113744	0.324066	5.48688
JC-20-19-17	32.7313	461.027	8.24009	791.08	3.91124	0.587296	43.4692	0.947803	7.00194	8.00766	1.81118	24.1739	6.9637	73.5191	26.0451	110.201	23.282	223.694	40.255	8586.74	0.971119	589.959	61.8251	528.134	0.117063	0.397979	14.2849
JC-20-19-18	32.7313	398.897	2.79792	821.043	3.79243	1.36316	26.8525	1.22092	6.17918	4.75496	0.580777	16.9611	5.88882	69.2732	27.289	125.752	29.5317	299.785	51.5277	8952.53	1.69783	666.96	40.9515	626.008	0.0654168	0.197712	5.1033
JC-20-19-21	32.7313	398.978	5.59233	1559.74	23.4434	16.8633	116.465	15.1943	72.8461	33.7797	4.85068	54.604	13.658	140.921	49.7327	225.219	52.921	523.383	93.6843	9352.91	7.35444	1414.12	260	1154.12	0.225279	0.345291	1.7839
JC-20-19-23	32.7313	518.238	13.7519	1389.55	9.40024	2.91552	67.2494	2.50991	12.7956	9.65652	3.26961	31.2858	10.6461	119.615	46.3977	205.315	46.0144	453.881	84.2773	7356.01	1.02741	1095.83	98.3965	997.432	0.0986498	0.575089	6.09517
JC-20-19-25	32.7313	394.959	4.35452	1015.61	2.37269	0.0848509	17.9466	0.125587	2.21716	4.71157	1.05747	24.0318	8.17163	95.17	34.6579	153.562	33.7399	329.684	57.1407	8797.97	1.01234	762.302	26.1432	736.158	0.0355131	0.303819	42.6251
JC-20-19-27	32.7313	477.181	8.26438	1338.08	5.58765	0.408557	57.684	0.626302	6.29521	8.14035	2.14148	30.7492	10.4454	117.125	44.816	197.04	44.9293	437.725	76.8788	7570.42	1.4544	1035	75.2959	959.708	0.078457	0.413807	27.959
